# Supplementary material for: Multiscale Assessment of Caprock Integrity for Geologic Carbon Storage in the Pennsylvanian Farnsworth Unit, Texas, USA
Source: Preprints.org preprint supplement (doi:10.20944/preprints202102.0121.v1), 2021-02-03
Supplement: Supplementary file 1 [file supplementary]

**Supplemental Material**

The following materials supplement the data, figures, and presentation given in the manuscript “Multiscale Assessment of Caprock Integrity…” by Trujillo et al. These include the following tables and figures, presented in the order of referencing in the main text:

**Tables**:

Table SM-1through Table SM-3 contain brief petrologic descriptions obtained from thin section observation by Steve Cather (Personal Communication, 2018) of the New Mexico Bureau of Geology and Mineral Resources, New Mexico, USA, of samples from wells 13-10A, 13-14, and 32-8 of the Farnsworth Unit (FWU) in West Texas, USA. These description form part of the basis of mapping the Schlumberger Heterogeneous Rock Analysis (HRA) lithological indicators (using a proprietary algorithm based on combining well log and caliper responses with rock mechanics laboratory testing results) to core-scale observations of rock properties. These tables include depth of thin section sampling, a brief description of texture, mineralogical content, fossil content, etc., the formation sampled, and the HRA classification associated with the sampling depth and descriptor.

Table SM-4 contains a summary of measurements of petrophysical properties of 2.54 cm (1”) diameter x nominally 5.0 cm (2”) length core plugs from Wells 13-14 and 32-8, performed by Schlumberger (formerly Terra Tek of Salt Lake City, USA), after Rose-Coss et al. (2017). The table includes depth of sampling, HRA classification, sample dimensions, dry bulk and grain densities, porosity measured at ambient conditions, water and oil saturation, and N2 gas permeability under ambient stress conditions. Measurements and data from core plugs from Well 13-10A are given in Appendix A, Table 1 of Rasmussen et al. (2019) and not repeated here. The HRA Rock Class assignments for Well 13-10A samples are not given in the Rasmussen et al. (2019) appendix but are dominantly from the Morrow-B unit and thus are assigned the “Dark Blue” classification, as shown in Figure 4 of the main text.

Table SM-5 contains a summary of measurements of caprock core samples from the Thirteen Finger Limestone and Morrow shales from the FWU characterization wells 13-10A, 13-14, and 32-8 obtained using the Schlumberger (formerly Terra Tek) proprietary Tight Rock Analysis. These lithofacies typically have poor core recovery and exhibit both difficulty in standard core plugging and core testing methodologies compared to the samples in Table SM-4. The table includes the sample ID; the HRA Rock Class Assignment; interpreted lithofacies by Rose-Coss et al. (2017); depth of sampling; measured dry bulk and grain densities; gas-filled, hydrocarbon-filled, and total porosities; water, gas and oil saturations; and pressure-decay permeability. A few listed samples had permeabilities above the range of the pressure decay method and instead were tested at listed stress conditions via Terra Tek’s pulse decay method.

Table SM-6 contains results of mercury intrusion capillary pressure (MICP) porosimetry performed by Micromeritics, Inc. of Houston, TX, USA on 2.54 cm (1”) diameter core plugs of reservoir and caprock lithofacies from wells 13-10A, 13-14, and 32-8. Core plugs were difficult to obtain from caprock lithofacies (from Thirteen Fingers Limestone and Morrow shale units) and so these measurements reflect a sampling bias of the more “core-able” lithologies. Selected reservoir core plugs underwent a cleaning via a toluene extraction method, and these are designated in the table by a ‘Y’ in the “Cleaning” column. Included in the table are the Terra Tek sampling ID, the HRA Rock Classification Assignment, the depth of sampling, the core plug orientation with respect the coring direction (‘h’ refers to horizontal and ‘v’ refers to vertical), whether the core plug was cleaned of hydrocarbons (‘y’ refers to yes or cleaned and ‘n’ refers to no or not cleaned), the calculated breakthrough pressure of mercury during flooding, the calculated CO2 column heights inferred to be supported by the measured capillary properties of the core plugs (see Methods section in the main text), the calculated permeability from the MICP results, and the calculated breakthrough or limiting pore-throat diameter.

Table SM-7 includes results of noble gas measurements from caprock lithologies from Well 13-10A of the FWU, performed by Dr. Solomon’s laboratory at the University of Utah, USA on preserved core samples. The table includes depth of sampling referred to the measured core depths; the sample mass; the measured as-is wet bulk density and total porosity; He and Ar isotopic contents; and relevant isotopic ratios.

**Figures:**

Figures SM-1 and SM-2 depict the Heterogeneous Rock Analysis (HRA) log prepared by Schlumberger using proprietary algorithm, for wells 13-14 and 32-8, to accompany Figure 4 in the main text (for Well 13-10A), which depicts well log and caliper results for FWU characterization wells. The logs include logging depth (in feet); depth of core (note some discrepancies with the logging depth) in feet; the whole core intervals extracted, shown in black; the inferred formation/unit tops; measured gamma ray and caliper logs; measured resistivity logs; porosity and lithology indicator logs (using a method proprietary to Schlumberger); the assigned HRA rock classification by color which includes eleven separate rock classes (two for the Morrow-B reservoir and nine for the caprock lithologies); estimations of the error in the HRA designation as assigned by Schlumberger; the core total gamma ray count; and the calculated core uranium, thorium, and potassium contents inferred using a proprietary method by Schlumberger.

Figures SM-3, SM-4, and SM-5 give results of the Schlumberger completion quality logs for wells 13-10A, 13-14, and 32-8. Along with the same log and core depths, completion intervals, gamma ray and caliper logs, and assigned HRA classification (shown in Figure 4 in the main text and figures SM-1 and -2 given here), these include calculated static and dynamic Young’s Modulus and Poisson’s Ratio, P- (compressional) and S- (shear) wave velocities, calculated minimum horizontal stress, and inferred fracture width. These data are presented as continuous curves and are compared to laboratory measurements given by the circles. Associated errors with these calculations are given in the “CQL-Error” column where the grey shading shows intervals with higher uncertainty. The calculated minimum horizontal stress and stress gradient are calculated using Schlumberger proprietary modeling assuming a pore pressure gradient ranging from 0.52 to 0.59 psi/ft (0.012 to 0.013 MPa/m respectively) and an overburden stress gradient of 1.08 psi/ft (0.024 MPa/m). The fractured width column depicts a relative ease of fracturing rock at a given depth, where wider widths are associated with lower fracture breakdown pressures and narrower widths associated with higher breakdown pressures.

Figure SM-6 (after Rose-Coss, 2017) are isopach maps of the thickness of each of the caprock lithologies and the total thickness of caprock at the FWU.

**Table SM-1.** Well 13-10A caprock thin section petrologic descriptors with Schlumberger

Heterogeneous Rock Classification (HRA) assigned unit color.

| **Depth (m)** | **Description** | **Formation** | **Class** |
| --- | --- | --- | --- |
| 2293.97 | Slightly fossiliferous, burrowed dolomite or dedolomite. Areas between burrows are organic-rich. A few intraclasts are present. No visible porosity. | 13 Fingers | Light Blue |
| 2298.39 | Slightly fossiliferous micritic and sparitic limestone with scattered dolomite rhombs. Dolomite crystals are 0.03–0.06 mm; micrite is brownish due to organic content. About half of thin the section is composed of a bed of organic-poor sparry calcite. No porosity is visible except for in one partly plugged natural fracture | 13 Fingers | Light Blue |
| 2299.40 | Organic-rich, fossiliferous, dolomitic claystone. No visible porosity. | 13 Fingers | Orange |
| 2299.87 | Slightly fossiliferous dedolomite or dolomitized micrite. No visible porosity. | 13 Fingers | Light Blue |
| 2318.18 | Fossiliferous, organic-rich marine claystone. Exhibits numerous burrows containing fossil shell hash (foraminifera, ostracods, brachiopods, and thin-shelled pelecypods). No visible porosity. | 13 Fingers | Black |
| 2319.73 | Fossiliferous, organic-rich marine claystone. Exhibits numerous burrows containing fossil shell hash (foraminifera, ostracods, brachiopods, and thin-shelled pelecypods). No visible porosity. | Morrow Shale | Black |
| 2320.19 | Coal. Contains thin layers and lenses of mudstone. Very low porosity. | Morrow Shale | Olive |
| 2326.43 | Fossiliferous, organic-rich mudstone. Contains minor quartz/feldspar silt and scattered microspar. | Morrow Shale | Brown |
| 2326.77 | Slightly fossiliferous, organic-rich, slightly calcareous mudstone. Contains scattered quartz, feldspar, muscovite and calcareous fossil-hash silt. No visible porosity. | Morrow Shale | Brown |
| 2329.42 | Fissile, slightly fossiliferous, organic-rich mudstone. Contains common silt (quartz, feldspar, muscovite) and minor microspar(?). No visible porosity. | Morrow Shale | Brown |
| 2333.09 | Slightly silty claystone. Contains minor quartz/muscovite/feldspar silt and many faint burrows. Claystone exhibits yellow birefringence, so probably consists of illite, smectite, and/or chlorite. No visible porosity. | Morrow Shale | Yellow |
| 2334.23 | Burrowed silty claystone. Contains significant quartz/muscovite /feldspar silt. Claystone exhibits yellow birefringence, so probably consists of illite, smectite, and/or chlorite. No visible porosity. | Morrow Shale | Yellow |
| 2351.92 | Laminated mudstone. Contains a few quartz/muscovite/feldspar silt layers. Clays exhibit yellow birefringence, so probably consist of illite, smectite, and/or chlorite. No visible porosity. |  | Red |

**Table SM-2.** Well 13-14 caprock thin section petrologic descriptors with Schlumberger

Heterogeneous Rock Classification (HRA) assigned unit color.

| **Depth (m)** | **Description** | **Formation** | **Class** |
| --- | --- | --- | --- |
| 2026.37 | Micritic CO3, Has minor terrigenous silt, lots of fine fossil hash. Marine. Fractures are all late or man-made. Very uniform texture. | 13 Fingers | Brown |
| 2028.20 | - Biosparite w/lots of marine fossils. Local layers of organic-rich micrite. Minor intra-fossil porosity, otherwise tight. NO fractures. Loose packing -> early spar. | 13 Fingers | Brown |
| 2028.50 | Same as above except moderate packing, no micrite. No fractures. Terrigenous grains are sand-sized. Closer to shore? | 13 Fingers | Brown |
| 2032.83 | Sandy biosparite/biomicrosparite. Much sand-sized quartz and feldspar. Many marine fossils. A few hairline, late fracture (possibly man-made?) | 13 Fingers | Light Blue |
| 2034.71 | Spar-cemented sandy biosparite (10 -15% of T.S.) Sand is fine, average ~ 0.2 mm, mostly quartz and feldspar. CO3 grains are mostly various marine fossils w/few peloids/coated grains. Spar cement. A few thin fractures, probably all man-made. Very low porosity, only a few scattered, dissolved fossil fragments (aragonite?). A few glauconite grains. | 13 Fingers | Light Blue |
| 2035.18 | Spar-cemented sandy (~10%) biosparite. Same as above but has more glauconite grains. Very low porosity, no natural fractures. Somewhat coarser-grained than above. | 13 Fingers | Light Blue |
| 2038.45 | Spar-cemented sandy (~10%) biosparite. Same as 6677.09. | 13 Fingers | Light Blue |
| 2040.50 | Spar-cemented sandy (~30-40%) biosparite. Quartz/feldspar sand subequal to CO3 grains (mostly fossil fragments) Sand is coarser than above, (~0.3mm) About 1/3 of t.s. is splits of organic-rich mudstone with yellow clay (illite/smectite) and quartz, feldspar, and minor muscovite silt. Mudstone may be calcareous. Possibly nearer to shore than above three thin sections. No natural fractures, very low porosity. | 13 Fingers | Light Blue & Black |
| 2044.03 | - Interlaminated siltstone and organic-rich silty claystone. Silt is quartz, feldspar, and muscovite. Clay is yellowish (illite/smectite). Some organics organized into very thin discontinuous laminae (coal seams?_). Coaly plant fragments ~ 0.015 mm thick. No natural fractures. No porosity in mudstone, slight porosity in siltstones and intergranular microporosity within clay cement matrix. | 13 Fingers | Black |
| 2045.38 | Coarse biosparite - fossil fragments (~0.6 mm average, mostly crinoid echinoid fragments ->single crystals). Cool Thin section. No siliciclastics. Clean, high energy CO3. No porosity except very few partly dissolved aragonite (?) fossils. No fractures. Well sorted. | 13 Fingers | Light Blue |
| 2046.45 | Slightly fossiliferous laminated, organic-rich dolomite or dedolomite (dedolo). Dolo/dedolo crystals are about 0.02 mm in micrite matrix. No fractures, no porosity. | 13 Fingers | Light Blue |
| 2050.88 | Burrowed neomorphic (?) sparite/ microsparite (~10-30 um) Very few fossils and quartz/feldspar silt. No porosity except remnant within bitumen-filled fractures. | 13 Fingers | Light Blue |
| 2318.42 | Dolomite or dedolo with rare fossil fragments and pellets. Dolomite is ~20 um size. No siliciclastics, no porosity. Most fractures are man-made except a few around the periphery that are filled completely with bitumen. | 13 Fingers | Light Blue |
| 2321.13 | Dark, organic-rich slightly silty claystone. No carbonate, Silt is quartz/feldspar mix. Cannot tell for sure about clays - possibly illite/smectite. No porosity, no natural fractures. | 13 Fingers | Grey |
| 2329.04 | Burrowed biomicrite. Lots of fossil fragments, some are phosphatic. Spar is locally present (neomorphic?). Poorly sorted, no dolomite or silt, no porosity or natural fractures. | 13 Fingers | Brown |
| 2332.12 | Burrowed biomicrite. Lots of fossil fragments, some coated grains. no porosity or natural fractures. | 13 Fingers | Brown |
| 2332.54 | Organic-rich silty mudstone. Silt is quartz/feldspar mix, ~40 um. Organics are disseminated and occur as thin seams, probably plant fragments. Numerous hair-line fractures are filled or partly filled with bitumen, otherwise, no porosity. | Morrow Shale | Orange |
| 2341.70 | Laminated organic-rich claystone with minor very fine silt. Yellowish birefringent clays. Numerous organic-rich partings; most are plant fragments but some may be bitumen-filled fractures that are parallel to bedding (SC doubts but is possible). No porosity, no burrows. | Morrow Shale | Orange |
| 2343.26 | Moderately burrowed claystone. Has a few percent quartz/feldspar fine silt. Moderate organics. Has several hairline fractures, partly to completely filled with bitumen, oblique to bedding, and yellowish birefringent clays. | Morrow Shale | Purple |
| 2345.22 | - Sandy mudstone. Sand is as coarse as 0.5 mm and grades down to silt (quartz/feldspar/muscovite). Clays have yellowish birefringence. Several thin fractures are partly to completely filled with bitumen. Weak intergranular microporosity within clayey areas are common. | Morrow Shale | Yellow |

**Table SM-3.** Well 32-8 caprock thin section petrologic descriptors with Schlumberger

Heterogeneous Rock Classification (HRA) assigned unit color.

| Depth (m) | Description | Formation | Rock Class |
| --- | --- | --- | --- |
| 2379.85 | Dark organic-rich calcareous mudstone. Laminated. Scattered very thin bivalves look like CO3-filled fractures, but are not - they are fossils. Clay birefringence is uncertain due to organics. Rare fine quartz/feldspar silt scattered throughout. No natural fractures or visible porosity. | 13 Fingers | Orange |
| 2382.89 | Organic-rich Micritic limestone, partly neomorphosed to microspar. No quartz/feldspar silt, no visible porosity. Numerous hairline fractures of various orientations are lined with bituminous material. Some fractures are en echelon; some are cross-cutting, and none have visible porosity. Cross-cutting relationships suggest subhorizontal fractures are younger than vertical. | 13 Fingers | Light blue |
| 2402.75 | Same as 7807.9 except slightly more (a few %) quartz/feldspar fine silt grains. No natural fractures, no visible porosity. Well laminated. | 13 Fingers | Orange |
| 2391.35 | Same as above except less well laminated. No natural fractures, no visible porosity. | 13 Fingers | Orange |
| 2394.43 | Slightly fossiliferous, organic-rich muddy Micritic limestone. Weakly laminated. No quartz/feldspar silt, no natural fractures, no visible porosity. | 13 Fingers | Light blue |
| 2397.19 | Fossiliferous, moderately organic-rich dolostone or de-dolostone. Carbonate is locally rhombic, so probably dolomite or de-dolomite. Weakly laminated, no natural fractures, no visible porosity. | 13 Fingers | Grey |
| 2409.65 | Well-laminated organic-rich mudstone with a few percent of quartz/feldspar silt. Has a Micritic parting but otherwise is mostly siliciclastics. Only slightly fossiliferous. No natural fractures, no visible porosity. | Morrow Shale | Yellow |
| 2412.50 | Mudstone with numerous laminae of silt and very fine sand. Much coaly plant fragments along bedding surfaces. Clays have yellow birefringence thus are probably illite or smectite. Local areas with diagenetic pyrite and associated gypsum (?) in vugs. no natural fractures, no visible porosity. | Morrow Shale | **Brown** |
| 2418.54 | Sandy mudstone. Sand grains are ~0.15 mm, floating in yellowish clay (illite/smectite). Lots of bedding-parallel fractures, but none obviously natural. Very low porosity. | Morrow Shale | Purple |
| 2424.99 | (probe) - Micrite with numerous floating spherulitic carbonate blebs ~0.2-0.4 mm diameter. These are subspherical, well sorted, bimineralic (both carbonate but outer rim is reddish). Weird rock. Some rare, scattered quartz/feldspar silt. No porosity except minor microporosity associated with reddish rim on spherules and minor occurrences in micrite matrix. No natural fractures. | Morrow-B | Green |
| 2437.26 | Dolomite or de-dolomite (0.1 mm) with scattered rare quartz/feldspar silt and mudstone intraclasts. Faintly burrowed. A few kerogen-rich streaks. No natural fractures, no visible porosity. | Lower Morrow | Light blue |
| 2440.67 | Moderately organic-rich laminated claystone with rare scattered quartz/feldspar silt. Local organic-rich partings and laminae, some of which are intersected by man-made fractures. No visible porosity clays are mostly yellowish birefringence so illite or smectite. No natural fractures. | Lower Morrow | Yellow |
| 2447.21 | Organic-rich laminated claystone with local silty partings. No visible porosity, no natural fractures. Clays are dominantly illite or smectite. | Lower Morrow | Orange |

**Figure SM1**. Well 13-14 HRA summary and accompanying well logs used in analysis; prepared by Schlumberger.

**Figure SM-2**. Well 32-8 HRA summary and accompanying well logs used in analysis; prepared by Schlumberger.

| **Table SM-4.** Summary of petrophysical properties (Terra Tek routine core analysis) |
| --- |

| **Sample ID** | **HRA**  **Rock Class** | **Depth (m)** | **Sample Length (cm)** | **Sample Diameter (cm)** | **Dry Bulk Density (g/cc)** | **Grain Density (g/cc)** | **Ambient Porosity (%)** | **Water Saturation (%)** | **Oil Saturation (%)** | **Gas Perm. NOB Stress (mD)** |
| --- | --- | --- | --- | --- | --- | --- | --- | --- | --- | --- |
| **Well 13-14** | | | | | | | | | | |
| 12 | Purple | 2347.4 | 3.89 | 2.53 | 2.312 | 2.719 | 14.99 | 32.97 | 13.99 | 0.50 |
| 13 | Green | 2348.3 | 3.91 | 2.53 | 2.147 | 2.710 | 20.79 | 20.21 | 23.69 | 3.53 |
| 14 | Green | 2349.4 | 3.84 | 2.54 | 2.156 | 2.669 | 19.22 | 29.47 | 23.04 | 100.7 |
| 15 | Dk Blue | 2350.1 | 3.95 | 2.53 | 2.206 | 2.720 | 18.91 | 18.12 | 20.41 | 24.58 |
| 16 | Green | 2351.0 | 3.88 | 2.53 | 2.243 | 2.664 | 15.80 | 16.77 | 18.35 | 2.98 |
| 17 | Green | 2351.9 | 3.95 | 2.53 | 2.147 | 2.653 | 19.10 | 23.64 | 19.82 | 7.17 |
| 18 | Green | 2352.9 | 3.85 | 2.53 | 2.230 | 2.668 | 16.42 | 24.55 | 17.26 | 5.13 |
| 19 | Green | 2353.8 | 3.92 | 2.53 | 2.224 | 2.635 | 15.59 | 27.55 | 19.48 | 39.32 |
| 20 | Green | 2354.7 | 3.89 | 2.55 | 2.104 | 2.655 | 20.76 | 9.73 | 9.87 | 519.8 |
| 21 | Dk Blue | 2355.6 | 3.95 | 2.55 | 2.167 | 2.639 | 17.88 | 25.78 | 16.99 | 449.4 |
| 22 | Green | 2356.5 | 3.92 | 2.54 | 2.335 | 2.651 | 11.91 | 13.98 | 21.69 | 2.28 |
|  | **Well 32-8** | | | | | | | | | |
| 1A | Purple | 2419.0 | 4.787 | 3.770 | 2.40 | 2.824 | 15.05 | 6.22 | 15.27 | 0.843 |
| 2A | Purple | 2420.0 | 4.594 | 3.767 | 2.30 | 2.674 | 13.91 | 8.70 | 10.34 | 0.510 |
| 3A | Dk Blue | 2420.8 | 4.325 | 3.766 | 2.28 | 2.652 | 14.07 | 12.24 | 12.20 | 2.276 |
| 4A | Green | 2421.8 | 4.573 | 3.761 | 2.24 | 2.731 | 18.11 | 5.43 | 15.18 | 1.537 |
| 5A | Dk Blue | 2422.6 | 4.500 | 3.765 | 2.27 | 2.652 | 14.38 | 7.63 | 7.97 | 1.076 |
| 6A | Dk Blue | 2423.6 | 4.493 | 3.763 | 2.32 | 2.668 | 13.06 | 10.12 | 11.47 | 0.893 |
| 7A | Dk Blue | 2424.5 | 4.435 | 3.763 | 2.31 | 2.668 | 13.26 | 4.74 | 17.14 | 1.551 |
| 8A | Dk Blue | 2425.4 | 4.681 | 3.761 | 2.34 | 2.663 | 12.12 | 9.36 | 12.15 | 0.444 |
| 9A | Dk Blue | 2426.2 | 4.706 | 3.762 | 2.30 | 2.660 | 13.69 | 10.26 | 11.55 | 0.700 |
| 10A | Dk Blue | 2427.3 | 4.475 | 3.754 | 2.37 | 2.667 | 11.28 | 15.12 | 8.95 | 0.626 |
| 11A | Dk Blue | 2428.2 | 4.739 | 3.767 | 2.29 | 2.725 | 16.13 | 8.21 | 15.50 | 0.921 |
| 12A | Dk Blue | 2429.4 | 4.917 | 3.763 | 2.23 | 2.649 | 15.96 | 11.46 | 11.55 | 1.311 |
| 13A | Dk Blue | 2429.9 | 4.447 | 3.762 | 2.32 | 2.644 | 12.22 | 13.25 | 8.59 | 0.626 |
| 14A | Dk Blue | 2430.8 | 4.816 | 3.764 | 2.32 | 2.649 | 12.29 | 12.30 | 10.20 | 0.728 |
| 15A | Dk Blue | 2431.7 | 4.517 | 3.759 | 2.32 | 2.648 | 12.34 | 10.66 | 13.59 | 1.499 |
| 16A | Dk Blue | 2432.8 | 4.627 | 3.766 | 2.38 | 2.655 | 10.43 | 9.58 | 20.65 | 0.678 |
| 17A | Dk Blue | 2433.6 | 4.550 | 3.764 | 2.29 | 2.646 | 13.61 | 12.48 | 11.71 | 2.763 |
| 18A | Green | 2434.6 | 4.715 | 3.766 | 2.33 | 2.645 | 11.78 | 11.87 | 8.42 | 0.884 |
| 19A | Dk Blue | 2435.5 | 4.556 | 3.764 | 2.36 | 2.653 | 10.99 | 10.77 | 9.23 | 0.569 |
| 20A | Dk Blue | 2443.7 | 4.962 | 3.766 | 2.30 | 2.680 | 14.24 | 6.29 | 37.58 | 1.056 |
| 21A | Dk Blue | 2444.5 | 4.781 | 3.764 | 2.25 | 2.646 | 14.83 | 6.21 | 44.03 | 0.790 |
| 22A | Dk Blue | 2445.5 | 4.251 | 3.762 | 2.18 | 2.657 | 17.93 | 3.89 | 39.42 | 12.256 |
| 23A | Dk Blue | 2446.4 | 4.921 | 3.770 | 2.198 | 2.649 | 17.02 | 3.32 | 44.81 | 23.415 |

** Results obtained from AP608 CoreTest Machine, 400 psi for Well 13-14 and 500 psi for Well 32-8

**Table SM-5. Terra Tek Tight rock analysis for mudstone and limestone lithofacies in the Morrow Shale and Thirteen Fingers Limestone.**

| **ID** | **HRA Rock Class** | | **Facies** | | **Core Depth (ft)** | **Bulk Density (g/cc)** | **Dry Grain  Density (g/cc)** | **Gas-Filled  Porosity (% of BV)** | **HC-Filled Porosity (% of BV)** | **Porosity (% of BV)** | **Water Sat (% of PV)** | **Gas Sat (% of PV)** | **Oil Sat  (% of PV)** | **Pressure-Decay  Permeability (mD)** |
| --- | --- | --- | --- | --- | --- | --- | --- | --- | --- | --- | --- | --- | --- | --- |
|  | |  | | **Well 13-10A** | | | | | | | | | | |
| 64 | Olive | | bcm | | 2279.6 | 2.66 | 2.72 | 1.69 | 2.13 | 2.52 | 15.51 | 67.05 | 17.44 | 7.0e-5 |
| 70 | Lt Blue | | bcm | | 2293.9 | 2.69 | 2.73 | 1.19 | 1.20 | 1.21 | 0.82 | 98.37 | 0.82 | 6.0e-5 |
| 78 | Purple | | bcm | | 2299.1 | 2.46 | 2.56 | 2.32 | 3.05 | 6.64 | 54.04 | 34.88 | 11.08 | 1.1e-4 |
| 73 | Black | | bcm | | 2318.0 | 2.51 | 2.63 | 3.09 | 3.41 | 5.35 | 36.31 | 57.63 | 6.05 | 1.6e-4 |
| 79 | Olive | | coal | | 2320.1 | 1.40 | * | 8.18 | * | * | * | * | * | 2.0e-4 |
| 80 | Brown | | cm | | 2326.5 | 2.45 | 2.70 | 7.69 | 7.75 | 10.06 | 23.04 | 76.36 | 0.61 | 2.0e-4 |
| 81 | Yellow | | gbm | | 2332.9 | 2.54 | 2.66 | 2.47 | 2.56 | 5.83 | 56.10 | 42.46 | 1.44 | 1.2e-4 |
| 82 | Yellow | | gbm | | 2334.2 | 2.56 | 2.68 | 2.88 | 2.97 | 5.33 | 44.33 | 54.08 | 1.60 | 1.4e-4 |
| E6 | Purple | | sl | | 2337.2 | 2.61 | 2.70 | 1.32 | 1.49 | 4.87 | 69.34 | 27.10 | 3.57 | 6.0e-5 |
| 69 | Dk Blue | | gbm | | 2348.8 | 3.15 | 3.27 | 2.77 | 2.83 | 4.22 | 33.05 | 65.57 | 1.38 | 5.0e-5 |
| 83 | Red | | gbm | | 2351.8 | 2.59 | 2.69 | 1.68 | 1.72 | 5.07 | 66.03 | 33.03 | 0.94 | 6.0e-5 |
|  | |  | | **Well 13-14** | | | | | | | | | | |
| 53 | Lt Blue | | mmt | | 2034.5 | 2.65 | 2.72 | 2.57 | 2.75 | 2.94 | 6.64 | 87.38 | 5.98 | 4.0e-5 |
| 54 | Black | | mmt | | 2035.1 | 2.66 | 2.72 | 2.13 | 2.22 | 2.51 | 11.68 | 84.81 | 3.50 | 4.0e-5 |
| 55 | Lt Blue | | mmt | | 2046.4 | 2.62 | 2.70 | 2.35 | 2.44 | 3.41 | 28.37 | 69.08 | 2.55 | 9.0e-5 |
| 56 | Grey | | bcM | | 2321.1 | 2.40 | 2.51 | 2.05 | 2.56 | 5.84 | 56.20 | 35.14 | 8.66 | 7.0e-5 |
| 41 | Orange | | cC | | 2321.7 | 2.44 | 2.55 | 2.44 | 3.64 | 5.35 | 32.04 | 45.53 | 22.43 | 1.4e-4 |
| 42 | Orange | | blM | | 2329.3 | 2.44 | 2.64 | 1.94 | 2.02 | 11.39 | 82.22 | 17.07 | 0.71 | 6.0e-5 |
| 43 | Orange | | blM | | 2338.4 | 2.34 | 2.62 | 1.91 | 2.02 | 16.16 | 87.47 | 11.82 | 0.71 | 8.0e-5 |
| 44 | Orange | | blM | | 2340.9 | 2.56 | 2.75 | 1.34 | 1.43 | 7.57 | 81.09 | 17.77 | 1.14 | 5.0e-5 |
| 45 | Orange | | blM | | 2341.2 | 3.12 | 3.20 | 1.42 | 1.62 | 2.89 | 43.87 | 48.95 | 7.18 | 7.0e-5 |
| 46 | Purple | | blM | | 2341.8 | 2.42 | 2.59 | 3.11 | 3.19 | 8.52 | 62.50 | 36.50 | 1.00 | 6.0e-5 |
| 57 | Yellow | | gbM | | 2343.0 | 2.55 | 2.66 | 1.64 | 1.73 | 5.39 | 68.01 | 30.42 | 1.57 | 8.0e-5 |
| 47 | Yellow | | gbM | | 2346.4 | 2.55 | 2.65 | 1.72 | 1.81 | 5.10 | 64.49 | 33.85 | 1.66 | 6.0e-5 |
| 48 | Purple | | sL | | 2347.0 | 2.62 | 2.70 | 1.62 | 1.79 | 3.71 | 51.68 | 43.67 | 4.65 | 5.0e-5 |
| 51 | Black | | gbM | | 2357.0 | 2.53 | 2.66 | 3.00 | 3.08 | 6.17 | 50.03 | 48.61 | 1.36 | 6.0e-5 |
| 52 | Yellow | | gbM | | 2357.6 | 3.01 | 3.10 | 1.88 | 2.08 | 3.73 | 44.22 | 50.47 | 5.31 | 8.0e-5 |
|  | |  | | **Well 32-8** | | | | | | | | | | |
| 25 | Black | | bcM | | 2382.6 | 2.68 | 2.69 | 0.17 | 0.19 | 0.20 | 4.91 | 85.28 | 9.81 | 4.4e-5 |
| 27 | Orange | | bcM | | 2391.2 | 2.27 | 2.37 | 1.59 | 2.26 | 5.53 | 59.10 | 28.77 | 12.12 | 8.5e-5 |
| 28 | Lt Blue | | Cs | | 2394.2 | 2.63 | 2.68 | 1.27 | 1.56 | 2.72 | 42.61 | 46.74 | 10.65 | 5.6e-5 |
| 29 | Grey | | Cs | | 2396.9 | 2.63 | 2.68 | 1.13 | 1.32 | 2.29 | 42.30 | 49.24 | 8.46 | 5.8e-5 |
| 31 | Brown | | gbM | | 2412.5 | 2.60 | 2.68 | 1.65 | 1.68 | 3.70 | 54.64 | 44.58 | 0.78 | 6.3e-5 |
| 32† | Purple | | gbM | | 2418.3 | 2.57 | 2.66 | 2.03 | 2.06 | 4.06 | 49.23 | 50.07 | 0.70 | 1.9e-3*  2.5e-4** |
| 52 | Yellow | | gbM | | 2440.8 | 2.58 | 2.65 | 1.34 | 1.36 | 3.74 | 63.55 | 35.94 | 0.51 | 4.0e-5 |
| 53† | Black | | gbM | | 2443.0 | 2.57 | 2.65 | 3.03 | 3.13 | 3.41 | 8.34 | 88.88 | 2.78 | 1.4e-3*  1.8e-4**  6.7e-5*** |
| 57 | Purple | | blM | | 2449.4 | 2.57 | 2.61 | 0.92 | 0.96 | 2.47 | 61.27 | 37.19 | 1.53 | 4.6e-5 |

*** NSA for Retort - 'Coal' Sample plugged pressure vessel and zero fluids recovered. † Due to the high permeability of these samples, they were outside of the pressure decay perm testing range. They were instead tested with the pulse decay system: *performed at *500 psi, **1500 psi, ***3000 psi mD confining pressure.**

**Table SM-6**. Mercury intrusion data and associated analysis by rock class for the 13-10A, 13-14, and 32-8 characterization wells.

| **Sample ID** | **HRA** | **Depth  (m)** | **Plug  orientation*** | **Cleaned** | **Formation** | **Break-through pressure,  mercury-air (MPa)** | **CO2 column height,  θ=10° (m)** | **CO2 column height,  θ=57° (m)** | **Calc. Perm (mD)** | **Breakthrough pore-throat  diameter (μm)** |
| --- | --- | --- | --- | --- | --- | --- | --- | --- | --- | --- |
| **Well 13-10A** | | | | | | | | | | |
| 70 | Lt Blue | 2294.2 | v | Yes | 13 Finger | 413.45 | 11681.4 | 6460.3 | 0.00E+00 | na |
| 80 | Brown | 2326.8 | v | Yes | Upper MS | 62.59 | 1768.4 | 978.0 | 2.00E-05 | 0.0235 |
| 82 | Yellow | 2334.2 | v | Yes | Upper MS | 57.27 | 1618.0 | 894.8 | 2.34E-04 | 0.0257 |
| E6 | Brown | 2337.2 | h | Yes | Upper MS | 52.34 | 1478.9 | 817.9 | 5.36E-05 | 0.0281 |
| 53 | Dk Blue | 2338.9 | h | Yes | Morrow B | 0.18 | 5.2 | 2.9 | 1.82E+00 | 8.0251 |
| 54 | Dk Blue | 2338.9 | h | No | Morrow B | 0.05 | 1.3 | 0.7 | 1.59E+01 | 31.0016 |
| E1 | Dk Blue | 2339.6 | h | Yes | Morrow B | 0.14 | 4.0 | 2.2 | 9.12E+00 | 10.5157 |
| E2 | Dk Blue | 2342.3 | h | Yes | Morrow B | 0.24 | 6.8 | 3.7 | 2.54E+00 | 6.1327 |
| E3 | Dk Blue | 2342.8 | h | Yes | Morrow B | 0.14 | 4.0 | 2.2 | 3.67E+00 | 10.5156 |
| 55 | Dk Blue | 2343.2 | h | Yes | Morrow B | 0.05 | 1.5 | 0.8 | 6.48E+01 | 28.2851 |
| 56 | Dk Blue | 2343.2 | h | No | Morrow B | 0.04 | 1.2 | 0.7 | 1.48E+02 | 33.832 |
| 57 | Dk Blue | 2344.3 | h | Yes | Morrow B | 0.07 | 2.1 | 1.2 | 1.90E+01 | 19.7748 |
| 58 | Dk Blue | 2344.3 | h | No | Morrow B | 0.05 | 1.5 | 0.8 | 2.67E+01 | 28.3262 |
| E4 | Dk Blue | 2345.8 | h | Yes | Morrow B | 0.07 | 2.1 | 1.2 | 3.25E+01 | 19.7912 |
| 59 | Dk Blue | 2347.3 | h | Yes | Morrow B | 0.03 | 0.9 | 0.5 | 1.22E+02 | 44.331 |
| 60 | Red | 2348.8 | h | No | Morrow B | 0.03 | 0.9 | 0.5 | 1.38E+02 | 44.3042 |
| **Well 13-14** | | | | | | | | | | |
| 41 | Black | 2321.7 | v | No | 13 Finger | 315.48 | 8955.1 | 4952.5 | 1.04E-06 | 0.0047 |
| 45 | Yellow | 2341.3 | v | No | Upper MS | 377.56 | 10717.2 | 5927.1 | 2.05E-06 | 0.0039 |
| 48 | Purple | 2347.1 | v | No | Upper MS | 68.64 | 1948.5 | 1077.6 | 5.05E-05 | 0.0214 |
| 49 | Purple | 2347.5 | v | Yes | Morrow B | 0.08 | 2.3 | 1.3 | 1.36E+01 | 18.0958 |
| 50 | Purple | 2347.5 | v | Yes | Morrow B | 0.26 | 7.5 | 4.1 | 1.49E+00 | 5.567 |
| 52 | Red | 2357.7 | v | No | Lower MB | 57.29 | 1626.2 | 899.3 | 6.78E-05 | 0.0257 |
| **Well 32-8** | | | | | | | | | | |
| 25 | Black | 2382.9 | v | No | 13 Finger | 140.65 | 4079.6 | 2256.2 | 3.90E-06 | 0.0105 |
| 31 | Brown | 2412.5 | v | No | Upper MS | 52.32 | 1517.6 | 839.3 | 1.30E-04 | 0.0281 |
| 32 | Purple | 2418.5 | v | No | Upper MS | 47.84 | 1387.5 | 767.4 | 5.24E-05 | 0.0307 |
| 34 | Purple | 2419.5 | h | No | Morrow B | 0.58 | 16.7 | 9.2 | 4.73E-01 | 2.5531 |
| 36 | Dk Blue | 2421.5 | v | No | Morrow B | 0.32 | 9.2 | 5.1 | 1.73E+00 | 3.9137 |
| 37 | Dk Blue | 2423.7 | h | No | Morrow B | 0.61 | 17.8 | 9.9 | 3.50E-01 | 2.0291 |
| 38 | Green | 2424.2 | h | No | Morrow B | 0.32 | 9.2 | 5.1 | 1.70E+00 | 3.9137 |
| 40 | Dk Blue | 2427.2 | h | No | Morrow B | 0.61 | 17.8 | 9.9 | 3.59E-01 | 2.0291 |
| 41 | Dk Blue | 2427.6 | h | No | Morrow B | 0.77 | 22.5 | 12.4 | 2.60E-01 | 1.6105 |
| 42 | Dk Blue | 2427.7 | h | No | Morrow B | 0.60 | 17.4 | 9.6 | 7.90E-01 | 2.0736 |
| 44 | Green | 2428.6 | h | No | Morrow B | 0.37 | 10.8 | 6.0 | 1.03E+00 | 3.3451 |
| 45 | Dk Blue | 2432.2 | v | No | Morrow B | 0.39 | 11.3 | 6.2 | 1.40E+00 | 3.2039 |
| 46 | Dk Blue | 2433.3 | h | No | Morrow B | 0.29 | 8.5 | 4.7 | 6.96E-01 | 4.2692 |
| 53 | Black | 2443.2 | v | No | lower sand | 1.72 | 49.8 | 27.6 | 6.94E-02 | 0.8561 |
| 54 | Dk Blue | 2445.2 | h | No | lower sand | 0.14 | 4.1 | 2.2 | 5.51E+00 | 10.488 |

**Figure SM-3**. Well 13-10A interpolated static and dynamic rock mechanics properties based on Schlumberger/Terra Tek HRA log analysis and lab experiments (shown as red and black dots).

**Figure SM-4**. Well 13-14 interpolated static and dynamic rock mechanics properties based on Schlumberger/Terra Tek HRA log analysis and lab experiments (shown as red and black dots).

**Figure SM-5**. Well 32-8 interpolated static and dynamic rock mechanics properties based on Schlumberger/Terra Tek HRA log analysis and lab experiments (shown as red and black dots). Remarks made by Schlumberger:

1. Eleven rock classes are defined by the Morrow multi-well Heterogeneous Rock Analysis (HRA) model.

2. The mechanical properties presented in the Completion Quality Log (CQL) are modeled from the Farnsworth Unit 1310A and Farnsworth Unit 1314 core results. Predictions are displayed as continuous curves whereas core data are shown as circles. Error associated with the predictions is presented in the CQL Error track, where gray shading indicates intervals with high uncertainty. Caution should be taken when interpreting the results over these intervals. 3. The minimum horizontal stress and its gradient are presented in the Uncalibrated Minimum Horizontal Stress track where the HRA rock classes are profiled by the calculated stress. The following parameters were used for the stress calculation: pore pressure gradient varies from 0.43 to 0.59 psi/ft over the displayed interval based on sonic scanner mechanical properties logs; overburden stress gradient = 1.08 psi/ft. The far-field minimum horizontal stress calculation is based on a gravity loading model, accounting for the rock anisotropic mechanical behavior; no corrections were applied with respect to any tectonic lateral strain or basin subsidence/uplifting effects. 4. The fracture width, presented in the Fracture Width track, is a unitless prediction of the relative net pressure required to fracture the rock at a given depth, normalized over the interval displayed in the CQL. Wider widths are associated with lower breakdown pressures whereas narrower

widths are associated with higher breakdown pressures.

**
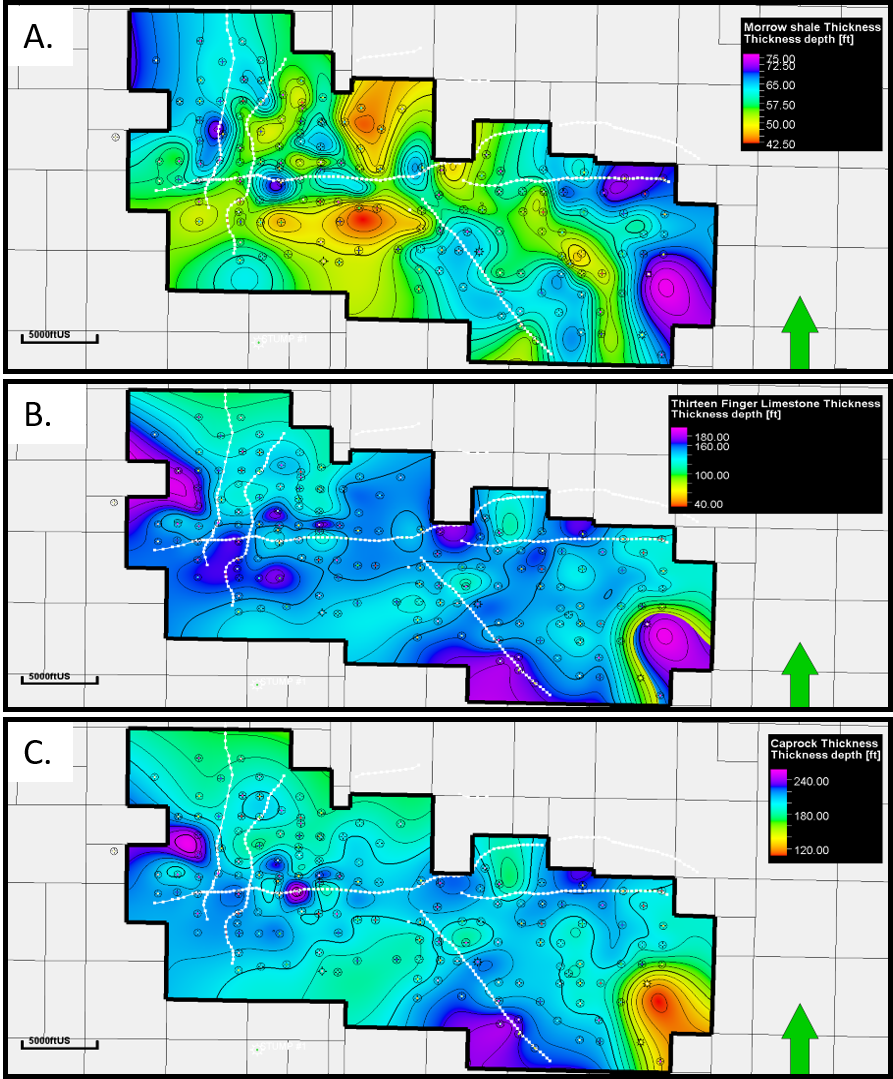
**

**Figure SM-6**. Isopach maps of caprock lithologies in the Farnsworth Unit. A. Morrow Shale B. Thirteen Finger Limestone. C. Total caprock thickness (after Rose-Coss, 2017).

**Table SM-7**. Results of noble gas analysis, including the sample mass and supplementary estimates of wet bulk density, total porosity based on laboratory analysis on fresh core samples or well log interpretation. “STP” stands for standard pressure and temperature.

| **Core depth  (m)** | **Sample  mass (g)** | **Wet  bulk density (g/cm3)** | | **Total porosity  (-)** | **3He (cm3 STP)** | **4He (cm3 STP)** | **20Ne (cm3 STP)** | **22Ne (cm3 STP)** | **36Ar (cm3 STP)** | **40Ar (cm3 STP)** | **R/Ra** | **20Ne/22Ne** | **36Ar/40Ar** | **4He/20Ne** |
| --- | --- | --- | --- | --- | --- | --- | --- | --- | --- | --- | --- | --- | --- | --- |
| 2275.4 | 267.57 | 2.43 | 0.07 | | 2.74E-11 | 1.22E-03 | 2.03E-08 | 1.39E-09 | - | - | 0.016 | 1.46E+01 | - | 6.04E+04 |
| 2276.0 | 135.8 | 2.69 | 0.01 | | 3.81E-12 | 1.43E-04 | 2.16E-07 | 1.99E-08 | - | 1.69E-04 | 0.019 | 1.08E+01 | - | 6.63E+02 |
| 2277.5 | 187.566 | 2.43 | 0.07 | | 2.26E-12 | 8.62E-05 | 1.25E-08 | 1.06E-09 | - | - | 0.019 | 1.18E+01 | - | 6.89E+03 |
| 2280.2 | 191.256 | 2.43 | 0.07 | | 4.52E-11 | 1.67E-03 | 3.67E-08 | 2.60E-09 | 1.56E-06 | 1.45E-04 | 0.020 | 1.41E+01 | 1.08E-02 | 4.54E+04 |
| 2286.5 | 225.226 | 2.43 | 0.07 | | 4.08E-12 | 1.63E-04 | 5.18E-08 | 4.66E-09 | 1.89E-06 | 2.23E-04 | 0.034 | 1.11E+01 | 8.48E-03 | 3.15E+03 |
| 2290.6 | 216.491 | 2.63 | 0.06 | | 4.64E-11 | 2.15E-04 | 1.11E-04 | 1.11E-05 | 2.05E-04 | 6.06E-02 | 0.470 | 1.00E+01 | 3.38E-03 | 1.93E+00 |
| 2292.7 | 185.263 | 2.20 | 0.33 | | 1.23E-12 | 5.66E-05 | 9.18E-09 | 5.28E-10 | - | 1.03E-04 | 0.016 | 1.74E+01 | - | 6.16E+03 |
| 2318.0 | 240.4 | 2.51 | 0.05 | | 5.28E-11 | 1.95E-03 | 2.56E-08 | 1.86E-09 | - | 2.17E-04 | 0.020 | 1.38E+01 | - | 7.65E+04 |
| 2321.9 | 209.52 | 2.51 | 0.05 | | 3.48E-11 | 1.26E-03 | 4.19E-08 | 2.36E-09 | - | 4.71E-04 | 0.020 | 1.78E+01 | - | 3.02E+04 |
| 2325.2 | 154.82 | 2.51 | 0.05 | | 4.96E-11 | 1.96E-03 | 9.53E-08 | 8.93E-09 | - | 5.82E-05 | 0.018 | 1.07E+01 | - | 2.05E+04 |
| 2329.4 | 150.96 | 2.51 | 0.05 | | 3.93E-11 | 1.45E-03 | 3.26E-08 | 1.75E-09 | - | - | 0.020 | 1.87E+01 | - | 4.46E+04 |
| 2332.1 | 187.22 | 2.54 | 0.06 | | 4.41E-11 | 1.79E-03 | 9.27E-08 | 6.75E-09 | 9.40E-09 | 1.86E-04 | 0.018 | 1.37E+01 | 5.06E-05 | 1.93E+04 |
| 2335.3 | 159.72 | 2.56 | 0.05 | | 7.53E-12 | 2.90E-04 | 2.42E-08 | 1.65E-09 | 1.84E-06 | 2.51E-04 | 0.019 | 1.47E+01 | 7.32E-03 | 1.20E+04 |
| 2337.8 | 145.36 | 2.41 | 0.15 | | 2.87E-13 | 9.30E-06 | 4.09E-08 | 3.69E-09 | - | - | 0.022 | 1.11E+01 | - | 2.27E+02 |
| 2340.6 | 233.62 | 2.41 | 0.14 | | 6.42E-11 | 5.06E-05 | 1.36E-04 | 1.31E-05 | 2.49E-04 | 7.08E-02 | 2.763 | 1.04E+01 | 3.52E-03 | 3.73E-01 |
| 2343.3 | 209.37 | 2.33 | 0.19 | | 3.72E-14 | 2.11E-06 | 1.54E-08 | 1.12E-10 | - | 2.87E-04 | 0.013 | 1.37E+02 | - | 1.37E+02 |
| 2345.2 | 99.57 | 2.34 | 0.18 | | 3.85E-13 | 1.65E-05 | 1.73E-07 | 1.43E-08 | 1.51E-06 | 1.89E-04 | 0.299 | 1.21E+01 | 8.02E-03 | 9.52E+01 |
| 2347.0 | 136.22 | 2.35 | 0.18 | | 1.15E-12 | 3.88E-05 | 2.70E-07 | 2.26E-08 | 5.67E-06 | 4.31E-04 | 0.111 | 1.20E+01 | 1.31E-02 | 1.44E+02 |
| 2354.2 | 685.73 | 2.64 | 0.13 | | 5.62E-11 | 2.11E-03 | 7.08E-08 | 4.70E-09 | - | 2.39E-04 | 0.019 | 1.51E+01 | - | 2.99E+04 |
